# Supplementary material for: In Vitro Digestibility of Minerals and B Group Vitamins from Different Brewers’ Spent Grains
Source: MDPI journal article supplement (doi:10.3390/nu14173512), 2022-08-26
Supplement: s1 [file s1]

**Table S1.** Limits of detection for mineral determination by ICP–OES and ICP-MS

| Element | LOD <sup>1</sup> (ICP-OES)          | Element | LOD <sup>1</sup> (ICP-MS)           |
|---------|-------------------------------------|---------|-------------------------------------|
|         | (mg kg <sup>-1</sup> ) <sup>1</sup> |         | (mg kg <sup>-1</sup> ) <sup>1</sup> |
| Na      | 0.80                                | Co      | 0.015                               |
| K       | 0.30                                | Cr      | 0.022                               |
| Ca      | 0.40                                | Ni      | 0.013                               |
| Mg      | 0.90                                | Ba      | 0.022                               |
| Fe      | 0.80                                | Sr      | 0.013                               |
| Cu      | 0.40                                | Rb      | 0.021                               |
| Zn      | 0.50                                | As      | 0.027                               |
| Mn      | 0.50                                | Cd      | 0.007                               |
|         |                                     | Hg      | 0.013                               |
|         |                                     | Pb      | 0.011                               |

<sup>1</sup> Limits of detection in solid calculated for 200 mg digested sample made up to 20 mL. ICP-OES: Inductively Coupled Plasma Optical Emission Spectrometer; ICP-MS: Inductively Coupled Plasma Quadrupole Mass Spectrometer
